# Supplementary material
Source: MDPI journal article supplement (https://www.mdpi.com/2073-4468/9/2/7)
Supplement: s1 [file s1]

## Supplementary Figure 1

1A

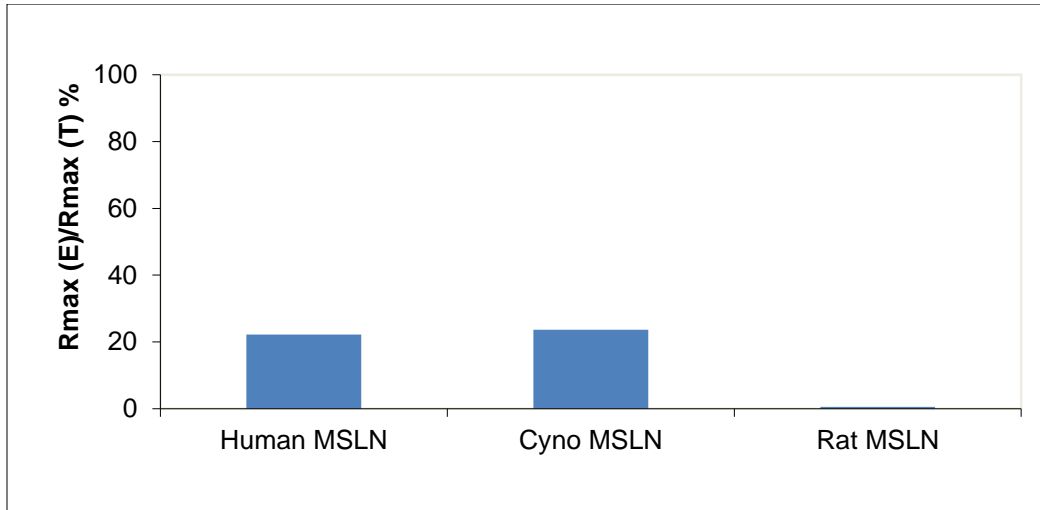

1B

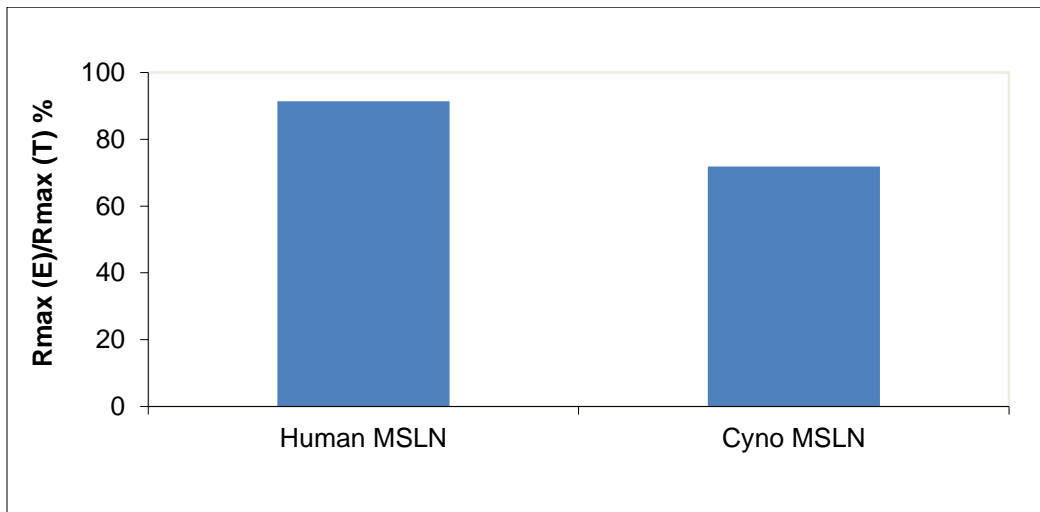

**Supplementary Figure 1.** Ratio of Rmax (E) and Rmax (T) of recombinant MSLN ECD expressed by (A) E.coli; and (B) CHO cells (fractions with the least glycosylation). Rat MSLN ECD expressed by CHO cells was not tested due to unavailability of the protein. Rmax (E) and Rmax (T) are maximum binding responses determined experimentally and theoretically.

**Supplementary Figure 2.**

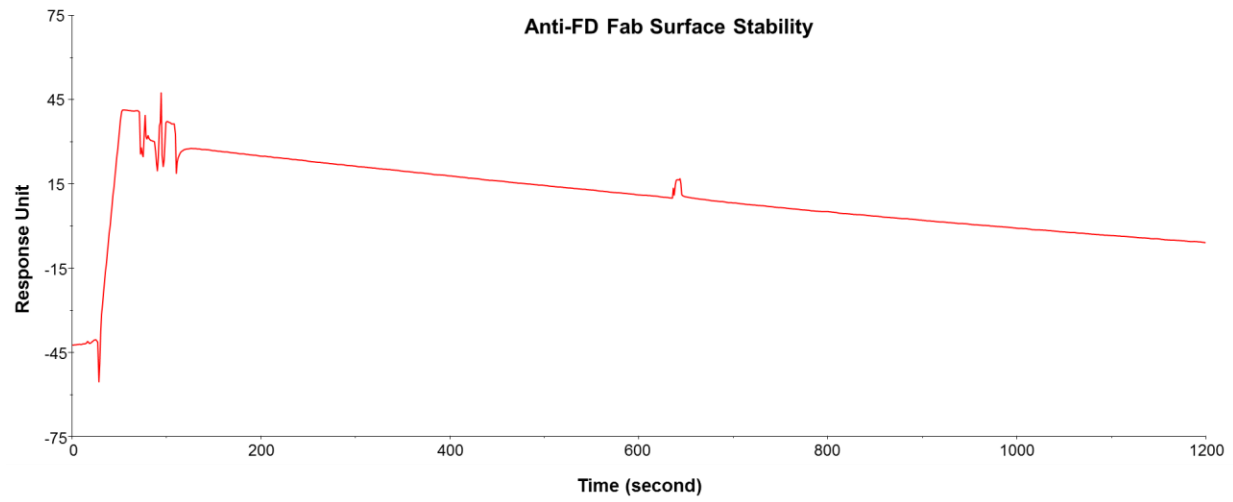

**Supplementary Figure 2.** Surface stability test of anti-FD Fab

Level of anti-FD Fab captured by an anti-Fab antibody over 15 minutes in an indirect capturing format at 37 °C. Level of anti-Fab antibody immobilized was approximately 8000 RU, and anti-FD Fab was indirectly captured at approximately 80 RU.
